# Supplementary material for: Plasticity in thermal hardening of the invasive Asian house gecko
Source: Research Square preprint supplement (doi:10.21203/rs.3.rs-240623/v1), 2021-02-23
Supplement: Supplementary file 1 [file 2d5f82e2b8ce85e80ff39178.xlsx]

## Sheet: CT
Location	Interval	SVL	1st CTmax	2nd CTmax	∆Ctmax	1st CTmin	2nd CTmin	∆Ctmin				Initial CTmax	Final CTmax	Initial CTmin	Final CTmin			Basal CTmax	Mean	SD	SE		Basal CTmin	Mean	SD	SE
Thailand	1	53.21	42.6	42.1	-0.5	12	12.7	0.7		Native	1	43.48	43.27	11.21	11.83			Thailand	43.5617	0.650187	0.0839388			11.18	0.769063	0.0992856
Thailand	1	52.74	43	42	-1	12.3	12.1	-0.2			3	43.55	43.8	11.04	10.75			Australia	43.645	0.516318	0.0666564			10.4367	0.846321	0.10926
Thailand	1	47.4	43.5	44.1	0.6	11.4	11.2	-0.2			5	43.38	44.08	11.27	10.36
Thailand	1	51.15	43.6	43.4	-0.2	10.8	11.5	0.7			7	43.61	43.98	11	10.86
Thailand	1	49.06	43.5	43.8	0.3	12.2	12.9	0.7			9	43.69	43.78	11.18	10.76
Thailand	1	51.74	43.6	44.1	0.5	9.6	11.9	2.3			11	43.66	43.48	11.38	11.04
Thailand	1	44.64	43.8	42.8	-1	11.1	10.9	-0.2		Introduced	1	43.48	43.92	10.73	10.06
Thailand	1	46.9	44.1	43.4	-0.7	9.4	12	2.6			3	43.69	43.8	10.2	9.72
Thailand	1	47.8	44	44	0	11.5	11	-0.5			5	43.46	43.55	10.31	10.49
Thailand	1	50.75	43.1	43	-0.1	11.8	12.1	0.3			7	43.57	43.61	10.16	10.58
Thailand	3	50.91	43.1	43	-0.1	11.7	10.6	-1.1			9	43.78	43.57	10.47	10.73
Thailand	3	49.57	43.6	44.4	0.8	10.8	10.8	0			11	43.89	43.62	10.75	10.85
Thailand	3	52.26	43.9	44.4	0.5	10.5	9.8	-0.7
Thailand	3	54.69	44	44	0	11.4	10.6	-0.8
Thailand	3	49.24	43.7	43.5	-0.2	12.3	10.5	-1.8		SD	1	0.463801	0.781807	1.01702	0.678315
Thailand	3	54.51	43.8	43.9	0.1	11.6	10.5	-1.1			3	0.698013	0.668331	0.691536	0.691616
Thailand	3	48.09	44.2	43.9	-0.3	10.2	10.9	0.7			5	0.656252	0.654557	0.605622	0.697933
Thailand	3	42.97	43.1	44.7	1.6	10.9	10.9	0			7	0.60452	0.551362	0.575423	0.733636
Thailand	3	47.03	41.9	42.5	0.6	10.8	12.5	1.7			9	0.868524	0.762744	0.931904	0.697933
Thailand	3	52.77	44.2	43.7	-0.5	10.2	10.4	0.2			11	0.665332	0.674619	0.828385	0.70899
Thailand	5	55.63	43.3	43.3	0	9.8	10.9	1.1			1	0.619677	0.511642	1.13827	0.676921
Thailand	5	46.84	42.9	44.2	1.3	11.5	10.9	-0.6			3	0.595259	0.46188	0.607362	0.690893
Thailand	5	49.33	43.7	43.6	-0.1	11.1	10.2	-0.9			5	0.330656	0.330824	0.746027	0.814385
Thailand	5	47.92	42.5	44	1.5	11.1	11.1	0			7	0.565784	0.53427	0.90701	1.002
Thailand	5	48.78	43.3	44.6	1.3	11	9	-2			9	0.475628	0.53135	0.535516	0.683211
Thailand	5	47.47	44.5	44.7	0.2	11.9	9.8	-2.1			11	0.435762	0.364539	0.99694	0.860555
Thailand	5	43.43	44.2	45.4	1.2	11.3	11.2	-0.1
Thailand	5	46.52	43.6	43.9	0.3	11.5	10.2	-1.3		SE	1	0.146667	0.247229	0.321611	0.214502
Thailand	5	51.2	43.3	43.6	0.3	11.6	9.8	-1.8			3	0.220731	0.211345	0.218683	0.218708
Thailand	5	50.98	42.5	43.5	1	11.9	10.5	-1.4			5	0.207525	0.206989	0.191514	0.220706
Thailand	7	58.88	42.7	43.2	0.5	11.3	11.4	0.1			7	0.191166	0.174356	0.181965	0.231996
Thailand	7	54.71	43.1	44	0.9	11.4	12.3	0.9			9	0.274651	0.241201	0.294694	0.220706
Thailand	7	46.1	42.9	43.8	0.9	10.7	9.9	-0.8			11	0.210396	0.213333	0.261958	0.224202
Thailand	7	50.13	44	43.9	-0.1	10	10	0			1	0.195959	0.161795	0.359954	0.214061
Thailand	7	46.93	43.7	44	0.3	10.3	10.7	0.4			3	0.188237	0.146059	0.192065	0.21848
Thailand	7	51.63	43.5	43.5	0	10.9	10.6	-0.3			5	0.104563	0.104616	0.235914	0.257531
Thailand	7	53.68	43.9	44	0.1	11.2	10.3	-0.9			7	0.178916	0.168951	0.286822	0.31686
Thailand	7	48.44	44.7	45	0.3	10.8	10.8	0			9	0.150407	0.168028	0.169345	0.21605
Thailand	7	47.17	43.5	43.6	0.1	11.9	11.4	-0.5			11	0.1378	0.115277	0.31526	0.272132
Thailand	7	40	44.1	44.8	0.7	11.5	11.2	-0.3
Thailand	9	53.16	43.7	44	0.3	11.3	10.8	-0.5
Thailand	9	50.96	44.2	44.7	0.5	12.1	10.4	-1.7
Thailand	9	48.17	44.5	45	0.5	12.4	11.4	-1
Thailand	9	45.3	44.3	44	-0.3	11.2	10.9	-0.3
Thailand	9	44.85	44.1	44.3	0.2	11.3	10.3	-1
Thailand	9	47.39	42.5	42.7	0.2	10	11.2	1.2
Thailand	9	46.17	41.8	42.8	1	9.6	11.5	1.9
Thailand	9	48.85	43.6	43.6	0	11.9	11.6	-0.3
Thailand	9	45.23	44.1	43.4	-0.7	11.7	9.5	-2.2
Thailand	9	44.86	44.1	43.3	-0.8	10.3	10	-0.3
Thailand	11	50.14	43.8	43.4	-0.4	12.2	10.4	-1.8
Thailand	11	53.96	43.6	43.7	0.1	11.2	10.7	-0.5
Thailand	11	46.75	43.5	44.2	0.7	10.8	10.1	-0.7
Thailand	11	47.41	43.6	43.3	-0.3	12.6	11	-1.6
Thailand	11	44.23	44.3	44	-0.3	11.3	10.5	-0.8
Thailand	11	49.26	43.9	42.8	-1.1	12.5	10.5	-2
Thailand	11	45.97	43.9	43.5	-0.4	11.6	11.4	-0.2
Thailand	11	43.93	44	43.7	-0.3	10.8	11.9	1.1
Thailand	11	50.42	44.1	44.2	0.1	10.2	11.9	1.7
Thailand	11	47.87	41.9	42	0.1	10.6	12	1.4
Australia	1	48.44	43	44.8	1.8	11.1	10.4	-0.7
Australia	1	55.03	43.2	44.2	1	9.9	10.2	0.3
Australia	1	47.71	44.2	43.8	-0.4	10.4	9.5	-0.9
Australia	1	53.88	42.7	43.8	1.1	10.3	9.6	-0.7
Australia	1	49.55	44.1	43.4	-0.7	8.8	8.6	-0.2
Australia	1	58	42.5	43.1	0.6	11.5	10.7	-0.8
Australia	1	52.99	43.4	43.6	0.2	12.1	10.3	-1.8
Australia	1	53.17	43.6	44.2	0.6	12.7	10.8	-1.9
Australia	1	46.35	44.1	44.5	0.4	10.3	10.6	0.3
Australia	1	51.79	44	43.8	-0.2	10.2	9.9	-0.3
Australia	3	50.02	43.4	43.8	0.4	10.7	10.7	0
Australia	3	54.72	44.3	43.8	-0.5	10.1	9.1	-1
Australia	3	54.87	44.2	44	-0.2	9.8	9.5	-0.3
Australia	3	52.4	44.4	44.5	0.1	9.6	9	-0.6
Australia	3	53.6	44.3	44.4	0.1	9.7	9.6	-0.1
Australia	3	57.83	43.2	43.3	0.1	10.7	9.1	-1.6
Australia	3	53.29	43.4	44	0.6	10.8	10.4	-0.4
Australia	3	44.61	42.6	43.7	1.1	10.4	10.2	-0.2
Australia	3	48.13	43.7	43.5	-0.2	11	10.6	-0.4
Australia	3	47.45	43.4	43	-0.4	9.2	9	-0.2
Australia	5	52.92	43.6	43.8	0.2	10.1	9.7	-0.4
Australia	5	58.93	43.6	43.7	0.1	11	10	-1
Australia	5	51.7	43.3	43.5	0.2	9.5	9.4	-0.1
Australia	5	50.81	43.9	43.7	-0.2	9.9	10.6	0.7
Australia	5	52.75	43.5	43.6	0.1	8.8	9.6	0.8
Australia	5	55.33	43.5	44	0.5	10.5	10.8	0.3
Australia	5	51.61	43.7	43.2	-0.5	11	11.3	0.3
Australia	5	54.07	43.2	43.3	0.1	10.8	10.5	-0.3
Australia	5	46.58	43.6	43.8	0.2	11.1	11.1	0
Australia	5	44.41	42.7	42.9	0.2	10.4	11.9	1.5
Australia	7	60.05	42.9	43.2	0.3	9.5	9.8	0.3
Australia	7	49.55	44.3	43.5	-0.8	9.4	9.5	0.1
Australia	7	56.6	44.2	44.6	0.4	9.3	9.8	0.5
Australia	7	49.95	43.4	44.1	0.7	9	9	0
Australia	7	54.29	43.2	43.1	-0.1	11.5	12	0.5
Australia	7	46.89	42.6	42.8	0.2	10.7	11.2	0.5
Australia	7	53.36	43.5	43.3	-0.2	10.4	11.2	0.8
Australia	7	51.08	43.6	43.9	0.3	11.6	10.7	-0.9
Australia	7	55.93	43.9	43.8	-0.1	10.3	10.9	0.6
Australia	7	51.41	44.1	43.8	-0.3	9.9	11.7	1.8
Australia	9	55.39	43.1	43.8	0.7	10.2	10.3	0.1
Australia	9	45.8	43	42.4	-0.6	10.4	10.5	0.1
Australia	9	54.81	44.2	43.9	-0.3	10.9	10.3	-0.6
Australia	9	53.79	43.4	43.5	0.1	10.3	9.7	-0.6
Australia	9	52.72	43.7	43.3	-0.4	9.7	10.6	0.9
Australia	9	59.59	44	43.1	-0.9	10.6	11.6	1
Australia	9	47.51	44.2	43.7	-0.5	10.1	10.2	0.1
Australia	9	51.51	44.4	44.2	-0.2	11.7	11	-0.7
Australia	9	50.71	43.9	44.1	0.2	10.5	11.2	0.7
Australia	9	50.53	43.9	43.7	-0.2	10.3	11.9	1.6
Australia	11	62.92	43.5	43.8	0.3	10.3	10.8	0.5
Australia	11	54.82	43.6	43.7	0.1	10.5	10.8	0.3
Australia	11	57.81	44.1	43.4	-0.7	10.1	10.1	0
Australia	11	47.69	44	43.5	-0.5	10.1	10.2	0.1
Australia	11	50.31	44.4	43.4	-1	9.6	9.5	-0.1
Australia	11	55.37	43.5	44.3	0.8	12.4	11.9	-0.5
Australia	11	58.69	44.4	43.4	-1	11.6	12.4	0.8
Australia	11	50.81	44.4	43.7	-0.7	11.9	11	-0.9
Australia	11	49.85	43.8	44	0.2	9.6	10.5	0.9
Australia	11	47.32	43.2	43	-0.2	11.4	11.3	-0.1

## Sheet: GLM
General Linear Model (with basal CTs and SVLs as covariates)
Final CTmax - Location * Interval								Final CTmin - Location * Interval								Shifted CTmax - Location * Interval								Shifted CTmin - Location * Interval
Dependent Variable:	Final_CTmax							Dependent Variable:	Final_CTmin							Dependent Variable:	Shifted_CTmax							Dependent Variable:	Shifted_CTmin
Location		Mean	Std. Error	95% Confidence Interval				Location		Mean	Std. Error	95% Confidence Interval				Location		Mean	Std. Error	95% Confidence Interval				Location		Mean	Std. Error	95% Confidence Interval
				Lower Bound	Upper Bound							Lower Bound	Upper Bound							Lower Bound	Upper Bound							Lower Bound	Upper Bound
NSW	1	44.016	0.151245	43.7158	44.3155			NSW	1.00	10.036	0.223743	9.59272	10.4799			NSW	1.00	0.404	0.146163	0.113905	0.693471			NSW	1.00	-0.772	0.223743	-1.21561	-0.328425		-10.808
	3	43.771	0.150846	43.4723	44.0704				3.00	9.873	0.229092	9.41868	10.3271				3.00	0.16	0.145778	-0.129151	0.448887				3.00	-0.935	0.229092	-1.38965	-0.481258		-10.808
	5	43.661	0.151854	43.3602	43.9623				5.00	10.59	0.22925	10.1353	11.0444				5.00	0.048	0.146752	-0.243094	0.338805				5.00	-0.218	0.22925	-0.672998	0.236022		-10.808
	7	43.635	0.149641	43.3387	43.932				7.00	10.771	0.227955	10.319	11.2229				7.00	0.03	0.144613	-0.25684	0.316577				7.00	-0.037	0.227955	-0.489366	0.41452		-10.808
	9	43.518	0.156417	43.2081	43.8283				9.00	10.747	0.23214	10.2869	11.2074				9.00	-0.104	0.151162	-0.403903	0.195483				9.00	-0.061	0.23214	-0.521431	0.399048		-10.808
	11	43.469	0.151696	43.168	43.7695				11.00	10.849	0.22155	10.4094	11.2879				11.00	-0.141	0.146599	-0.4314	0.149894				11.00	0.04	0.22155	-0.398898	0.479589		-10.809
Thailand	1	43.345	0.149852	43.0479	43.6421			Thailand	1.00	11.694	0.223484	11.2513	12.1374			Thailand	1.00	-0.369	0.144817	-0.656481	-0.0822533			Thailand	1.00	0.886	0.223484	0.442927	1.32909
	3	43.797	0.152472	43.4945	44.0991				3.00	10.739	0.226445	10.2903	11.1882				3.00	0.176	0.147349	-0.115979	0.468287				3.00	-0.069	0.226445	-0.518056	0.379843
	5	44.196	0.150986	43.8964	44.495				5.00	10.235	0.225079	9.78843	10.6809				5.00	0.598	0.145913	0.308667	0.887241				5.00	-0.574	0.225079	-1.0199	-0.127419
	7	43.936	0.153475	43.6318	44.2403				7.00	10.874	0.227972	10.4225	11.3264				7.00	0.327	0.148319	0.0334309	0.621543				7.00	0.066	0.227972	-0.385869	0.518083
	9	43.709	0.1507	43.4105	44.0081				9.00	10.684	0.225488	10.2369	11.131				9.00	0.203	0.145637	-0.0854241	0.492053				9.00	-0.124	0.225488	-0.571419	0.322684
	11	43.407	0.153597	43.1021	43.7112				11.00	10.938	0.233774	10.4741	11.4011				11.00	-0.252	0.148436	-0.546149	0.0424296				11.00	0.129	0.233774	-0.334228	0.592731
a. Covariates appearing in the model are evaluated at the following values: Basal_CTmax = 43.6033, SVL = 50.6507.								a. Covariates appearing in the model are evaluated at the following values: SVL = 50.6507, Basal_CTmin = 10.8083.								a. Covariates appearing in the model are evaluated at the following values: SVL = 50.6507, Basal_CTmax = 43.6033.								a. Covariates appearing in the model are evaluated at the following values: SVL = 50.6507, Basal_CTmin = 10.8083.
Tests of Between-Subjects Effects								Tests of Between-Subjects Effects								Tests of Between-Subjects Effects								Tests of Between-Subjects Effects
Dependent Variable:	Final_CTmax							Dependent Variable:	Final_CTmin							Dependent Variable:	Shifted_CTmax							Dependent Variable:	Shifted_CTmin
Source	Type III Sum of Squares	df	Mean Square	F	Sig.	Partial Eta Squared		Source	Type III Sum of Squares	df	Mean Square	F	Sig.	Partial Eta Squared		Source	Type III Sum of Squares	df	Mean Square	F	Sig.	Partial Eta Squared		Source	Type III Sum of Squares	df	Mean Square	F	Sig.	Partial Eta Squared
Corrected Model	19.156a	13	1.47355	6.59031	4.61628e-09	0.446978		Corrected Model	38.884a	13	2.99108	6.12172	2.05683e-08	0.428825		Corrected Model	17.753a	13	1.36562	6.5397	5.41623e-09	0.445073		Corrected Model	56.914a	13	4.37801	8.96027	3.94151e-12	0.52356
Intercept	6.96937	1	6.96937	31.1699	1.83555e-07	0.227236		Intercept	12.7419	1	12.7419	26.0783	1.45419e-06	0.197446		Intercept	6.54187	1	6.54187	31.3278	1.72385e-07	0.228124		Intercept	12.7419	1	12.7419	26.0783	1.45419e-06	0.197446
Basal_CTmax	11.8531	1	11.8531	53.0119	6.08879e-11	0.333383		SVL	1.04133	1	1.04133	2.13125	0.147281	0.0197098		SVL	0.11969	1	0.11969	0.573173	0.450681	0.00537821		SVL	1.04133	1	1.04133	2.13125	0.147281	0.0197098
SVL	0.300585	1	0.300585	1.34434	0.248875	0.0125236		Basal_CTmin	6.95933	1	6.95933	14.2433	0.000265111	0.118454		Basal_CTmax	6.7995	1	6.7995	32.5615	1.05839e-07	0.234997		Basal_CTmin	33.4881	1	33.4881	68.5386	4.03818e-13	0.392685
Location	0.0682516	1	0.0682516	0.305249	0.581773	0.00287144		Location	2.88496	1	2.88496	5.90452	0.0167821	0.0527639		Location	0.0554347	1	0.0554347	0.265466	0.607462	0.00249814		Location	2.88496	1	2.88496	5.90452	0.0167821	0.0527639
Interval	2.76979	5	0.553959	2.47753	0.0364833	0.104636		Interval	6.13933	5	1.22787	2.51302	0.0342437	0.105976		Interval	3.06275	5	0.612549	2.93338	0.0160714	0.121549		Interval	6.13933	5	1.22787	2.51302	0.0342437	0.105976
Location * Interval	4.22181	5	0.844362	3.77633	0.00346601	0.151196		Location * Interval	13.6389	5	2.72779	5.58284	0.000132064	0.208448		Location * Interval	5.36619	5	1.07324	5.13954	0.000292229	0.195126		Location * Interval	13.6389	5	2.72779	5.58284	0.000132064	0.208448
Error	23.7009	106	0.223593					Error	51.7918	106	0.488602					Error	22.1349	106	0.20882					Error	51.7918	106	0.488602
Total	229258	120						Total	13750.4	120						Total	40.86	120						Total	111.03	120
Corrected Total	42.857	119						Corrected Total	90.6759	119						Corrected Total	39.888	119						Corrected Total	108.706	119
a. R Squared = .447 (Adjusted R Squared = .379)								a. R Squared = .429 (Adjusted R Squared = .359)								a. R Squared = .445 (Adjusted R Squared = .377)								a. R Squared = .524 (Adjusted R Squared = .465)
ANOVA
Basal CTmax								Basal CTmin
Tests of Between-Subjects Effects								Tests of Between-Subjects Effects
Dependent Variable:	Basal_CTmax							Dependent Variable:	Basal_CTmin
Source	Type III Sum of Squares	df	Mean Square	F	Sig.	Partial Eta Squared		Source	Type III Sum of Squares	df	Mean Square	F	Sig.	Partial Eta Squared
Corrected Model	3.689a	12	0.307377	0.884358	0.564988	0.0902311		Corrected Model	22.752a	12	1.896	2.85817	0.00190598	0.242735
Intercept	1244.64	1	1244.64	3580.97	4.37948e-84	0.970987		Intercept	50.589	1	50.589	76.2616	3.70593e-14	0.416135
SVL	1.32386	1	1.32386	3.80889	0.053595	0.0343735		SVL	1.82631	1	1.82631	2.75311	0.0999937	0.0250846
Location	0.806618	1	0.806618	2.32073	0.130611	0.0212286		Location	18.1657	1	18.1657	27.3843	8.36856e-07	0.203776
Interval	1.63015	5	0.32603	0.938024	0.459545	0.0419923		Interval	3.37209	5	0.674418	1.01667	0.411593	0.0453532
Location * Interval	0.331728	5	0.0663456	0.190883	0.965462	0.00884092		Location * Interval	0.896093	5	0.179219	0.270167	0.928523	0.0124672
Error	37.1901	107	0.347571					Error	70.9797	107	0.663362
Total	228191	120						Total	14112.1	120
Corrected Total	40.8787	119						Corrected Total	93.7317	119
a. R Squared = .090 (Adjusted R Squared = -.012)								a. R Squared = .243 (Adjusted R Squared = .158)
Correlations
Correlations						Correlations
		Basal_CTmax	Shifted_CTmax					Basal_CTmin	Shifted_CTmin
Basal_CTmax	Pearson Correlation	1	-.472**			Basal_CTmin	Pearson Correlation	1	-.554**
	Sig. (2-tailed)		5.39454e-08				Sig. (2-tailed)		5.45682e-11
	N	120	120				N	120	120
Shifted_CTmax	Pearson Correlation	-.472**	1			Shifted_CTmin	Pearson Correlation	-.554**	1
	Sig. (2-tailed)	5.39454e-08					Sig. (2-tailed)	5.45682e-11
	N	120	120				N	120	120
**. Correlation is significant at the 0.01 level (2-tailed).						**. Correlation is significant at the 0.01 level (2-tailed).
Correlations						Correlations
		SVL	Shifted_CTmax					SVL	Shifted_CTmin
SVL	Pearson Correlation	1	-0.0308048			SVL	Pearson Correlation	1	0.0777453
	Sig. (2-tailed)		0.738382				Sig. (2-tailed)		0.398657
	N	120	120				N	120	120
Shifted_CTmax	Pearson Correlation	-0.0308048	1			Shifted_CTmin	Pearson Correlation	0.0777453	1
	Sig. (2-tailed)	0.738382					Sig. (2-tailed)	0.398657
	N	120	120				N	120	120
